1 The Nutrient and Energy Pathway Requirements for Surface Motility of Nonpathogenic and  
2 Uropathogenic *Escherichia coli*

3

4 Sushmita Sudarshan,<sup>a#</sup> Jacob Hogins,<sup>a</sup> Sankalya Ambagaspitiye,<sup>a</sup> Philippe Zimmern,<sup>b</sup> Larry  
5 Reitzer<sup>a</sup>

6

7 <sup>a</sup>Department of Biological Sciences, University of Texas at Dallas, Richardson, TX

8 <sup>b</sup>Department of Urology, University of Texas Southwestern Medical School, Dallas, TX

9

10 Running Head: Energy Requirements for *E. coli* surface motility

11

12 #Address correspondence to Larry Reitzer, reitzer@utdallas.edu

13

## 14 **ABSTRACT**

15 Uropathogenic *E. coli* (UPEC) is the causative pathogen for most uncomplicated urinary  
16 tract infections. Flagellar-mediated motility is essential for virulence and colonization for  
17 ascending urinary tract infections. The appendage requirement for surface motility depends on  
18 the strain: nonpathogenic *E. coli* (NPEC) lab strains use pili, NPEC hypermotile derivatives use  
19 flagella, and UPEC strains use flagella. *E. coli* flagella-dependent surface motility had been  
20 previously shown to require glucose and amino acids. We examined the nutritional and pathway  
21 requirements of the NPEC strain W3110 for pili-dependent surface motility, which have not been  
22 previously examined. We then compared these requirements to those for two strains with  
23 flagella-dependent surface motility: a variant of W3110, W3110-J1, in which the synthesis of the  
24 activator of flagella synthesis has been upregulated and the UPEC strain UTI89. The glucose  
25 requirement for W3110 was higher than that for either W3110-J1 or UTI89. The pathways  
26 required for motility were also different. W3110, but not UTI89, required the Embden-  
27 Meyerhof-Parnas pathway via PfkA; conversely, UTI89, but not W3110, required the Entner-  
28 Doudoroff pathway, acetogenesis, and the TCA cycle. Glucose did not control flagella synthesis  
29 for W3110-J1 and UTI89. The differing requirements for surface motility are likely to reflect  
30 major metabolic differences between strains. The metabolic requirements for UTI89 motility  
31 suggest a specific adaptation to the urinary tract environment.

## 32 **IMPORTANCE**

33 Urinary tract infections affect over 50% of women and *E. coli* is the most common  
34 uropathogen. Virulence requires both pili and flagella, and both appendages can contribute to  
35 surface motility. Previous studies of *E. coli* surface motility did not consider the appendage  
36 requirement and the ability to switch the surface appendage. The nutrient and pathway

37 requirements for surface motility of a non-pathogenic *E. coli* strain with either pili- or flagella-  
38 dependent surface motility and the uropathogen UTI89 were examined. Pili-dependent surface  
39 motility required glycolysis, while flagella-dependent motility required the TCA cycle and  
40 oxidative phosphorylation and was less dependent on glycolysis. The distinctive nutrient and  
41 pathway requirements for UTI89 motility probably result from metabolic adaptations to the  
42 urinary tract.

43

## 44 INTRODUCTION

45 Swarming is flagella-dependent bacterial surface motility (1-3). Swarming cells express  
46 virulence genes and show enhanced resistance to both engulfment and antibiotics (4-7). The  
47 genetic requirements for *E. coli* swarming were examined for mutants of the Keio collection,  
48 which contains deletions in most non-essential genes (8). Swarming motility required flagella,  
49 but unexpectedly also required pili. The authors suggested that some genes for pili synthesis  
50 were required for flagella synthesis which is not consistent with subsequent evidence that pili  
51 and flagella synthesis are mutually exclusive (9-11). Our recent results show that surface motility  
52 of common *E. coli* lab strains, including the parental strain of the Keio mutants, requires pili, but  
53 fast variants rapidly appear due to a mutation that increases expression of the master regulator  
54 for flagella synthesis (11). In other words, results using Keio collection mutants involved strains  
55 that either expressed pili or flagella or both if a flagella-synthesizing variant was generated  
56 during the motility assay. The requirements for motility are likely to depend on the appendage  
57 and must be reexamined in strains for which the motility appendage is unambiguously known.

58 Urinary tract infections (UTIs) are one of the most common bacterial infections, affecting  
59 approximately 150 million people worldwide each year (12). UTIs have produced an increasing

60 burden on the healthcare system because of recurrence and antibiotic resistance (13). Women are  
61 more prone to UTIs than men with over 50% of women experiencing at least one infection in  
62 their lifetime (13). The most common uropathogen is *E. coli* (14, 15), which is responsible for  
63 about 80-90% of community acquired UTIs and 40-50% of nosocomial acquired UTIs (13). A  
64 recent study found that *E. coli* was present in the urine of 65.5% of 4453 women with UTIs (16).

65 *E. coli* generally resides in the intestinal tract, but uropathogenic *E. coli* (UPEC), a  
66 pathotype of extra intestinal pathogenic *E. coli*, can migrate, adapt and colonize the urinary tract  
67 and cause a urinary tract infection (UTI) (17). UPEC can infect the urinary tract, kidneys, and  
68 bloodstream causing cystitis, pyelonephritis, and sepsis, respectively. Nutrient availability differs  
69 between the intestinal and urinary tracts (18, 19). The metabolic pathways required for growth in  
70 each environment differ and UPEC metabolism is adapted to the urinary tract. For example,  
71 growth of *E. coli* in the intestinal tract requires multiple carbohydrates, while growth in the  
72 urinary tract is proposed to require amino acids and peptides (18, 20, 21).

73 A UTI also requires flagella-mediated movement (22). In a murine model, the UPEC  
74 strain CFT073 required flagellin, the *fliC* product, to ascend to the upper urinary tract (22). 95%  
75 of UTIs may be ascending infections meaning that the infection begins by colonization of the  
76 periurethral area, followed by movement up the urethra into the bladder, and possibly into the  
77 ureters and kidneys (23). The implicit assumption of such studies is that movement only requires  
78 flagella. However, the presentation of human UTI varies from localized trigonitis to unlocalized  
79 pancystitis (24). The movement required for establishment of a localized UTI may differ from  
80 that required for progression to pancystitis and the latter could conceivably involve pili, even  
81 though pili are primarily associated with adhesion.

82           Our goals were to examine the nutrient and pathway requirements for surface motility of  
83 a non-pathogenic *E. coli* lab strain with either pili- or flagella-dependent surface motility, and to  
84 compare these requirements to those of the UPEC strain UTI89. We then discuss our results in  
85 relation to nutrient and pathway requirements for CFT073 infection in a mouse model.

86

## 87 **RESULTS**

### 88 **Requirement of glucose for surface motility.**

89           We examined the glucose requirement for surface motility for three strains: non-  
90 pathogenic W3110 which requires pili for surface movement; J1 which is a hypermotile  
91 derivative of W3110 that utilizes flagella for surface movement because of an IS5 insertion in  
92 the *flhDC* promoter region; and uropathogenic UTI89 which also moves with flagella (11).  
93 Electron microscopic images of these strains taken from surface motility plates confirmed their  
94 appendage requirement (Fig 1). W3110 moved relatively slow, did not reach the plate's edge  
95 during the assay, and formed a ring pattern which resembles the swarm pattern of *Proteus*  
96 *mirabilis* (25) (Fig 2). Its movement required 0.5% glucose. J1 and UTI89 movement with 0.5%  
97 glucose covered the entire plate with no discernible pattern. J1 moved less well with 0.25%  
98 glucose, but UTI89 moved normally. J1 and UTI89 did not move with 0.125% glucose. The  
99 glucose requirement was different for each strain, and the strains with flagella-dependent surface  
100 motility had a lower glucose requirement.

101

102 **Surface-motility of mutants with defects in glucose transport and pathways of**  
103 **carbohydrate metabolism.**

104 We examined surface motility in mutants with defects in glucose transport and the  
105 following pathways of central metabolism: the Embden-Meyerhof-Parnas (EMP) pathway,  
106 which is the standard glucose-degrading pathway for numerous organisms including *E. coli*;  
107 gluconeogenesis; the oxidative branch of the pentose cycle; the Entner-Doudoroff (ED) pathway,  
108 which is an alternate glycolytic pathway that degrades glucose to pyruvate; and acetogenic  
109 enzymes that convert pyruvate to acetate. Mutants with defects in these pathways have been  
110 examined in mouse models of UTIs (reviewed in (18)). These pathways are important for energy  
111 generation and biosynthesis of a variety of intermediates, such as NADPH and ribose-5-  
112 phosphate, triose phosphates for the glycerol backbone of phospholipids, 3-phosphoglycerate for  
113 serine, glycine, and cysteine synthesis, pyruvate for acetyl-CoA synthesis, and acetyl-CoA for  
114 either the TCA cycle or acetate formation.

115 The results of the mutational analysis are shown in Figs 3 and S1 and summarized in  
116 Table 1. For W3110, surface motility required a gene for the rate-limiting enzyme of the EMP  
117 pathway, *pfkA* (phosphofructokinase); three genes of the major glucose transport system — *ptsG*,  
118 *ptsH*, *ptsI*; the first gene of the oxidative pentose cycle, *zwf* (glucose-6-phosphate  
119 dehydrogenase); and a gene required for synthesis of the 3-phosphoglycerate family of amino  
120 acids, *serB* (phosphoserine phosphatase). W3110 moved less well with deletions in genes of  
121 gluconeogenesis, *pck* (phosphoenolpyruvate carboxykinase) and the ED pathway, *edd*  
122 (phosphogluconate dehydratase) and *eda* (KDPG aldolase). Loss of acetogenic genes — *pta*  
123 (phosphotransacetylase) and *ackA* (acetate kinase) — did not impair movement.

124 J1 surface motility required PfkA, but unlike parental W3110 did not require the  
125 oxidative pentose cycle (*zwf*) or components of the major glucose transport system—*ptsG*, *ptsH*,  
126 and *ptsI*.

127           The pathway requirements for pathogenic UTI89 were different from both W3110 and  
128 J1. UTI89 movement was not affected by loss of *pfkA*, *ptsG*, and *pck*, and was substantially or  
129 completely impaired by loss of *ptsI*, *ptsH*, the ED pathway genes *eda* and *edd*, *zwf*, the  
130 acetogenic genes *ackA* and *pta*, and *serB*.

131

## 132 **Factors that affect the glucose requirement**

133           **Iron limitation.** Iron can modulate the expression of genes of energy metabolism, so we  
134 examined the effect of supplemental 2,2-bipyridyl (BIP), an iron chelator, on surface motility  
135 (26). With BIP (low iron) UTI89 moved with 0.125% glucose (Fig 4), but not without glucose  
136 (not shown). Low iron restored movement of J1 with 0.25% glucose and allowed partial  
137 movement with 0.125% glucose. W3110 showed some movement with 0.25% glucose but no  
138 movement at 0.125% glucose (Fig 4). Surface motility plates with BIP and no glucose did not  
139 support growth in any of the strains (not shown). Even with low iron, flagella-mediated motility  
140 required a lower concentration of glucose than pili-mediated motility.

141           **Glycerol, cysteine, and pyruvate.** We examined whether glycerol, cysteine, and  
142 pyruvate could reduce the glucose requirement for W3110 because: (a) we could not genetically  
143 test the importance of glycerol-3-P which is required for phospholipid synthesis, (b) a higher  
144 than normal level of cysteine has been shown to be a requirement for *S. enteric* surface motility  
145 (27, 28), which is consistent with the result that a W3110  $\Delta$ *serB* mutant failed to move (Fig. S1),  
146 and (c) pyruvate is a product of carbohydrate catabolism and is a major branch point of  
147 metabolism that can provide energy via the TCA cycle, and generate alanine and acetate.  
148 Supplements were added to medium with 0.125% glucose and 100  $\mu$ M BIP, which does not  
149 support surface motility of W3110 (Fig 4). A combination of 2 mM cysteine, 0.1% glycerol, and

150 0.1% pyruvate stimulated surface motility (Fig 5). Cysteine omission did not prevent movement  
151 but altered the motility pattern (Fig 5); glycerol omission severely impaired movement (Fig 5);  
152 and pyruvate omission had no effect on movement (Fig 5). Glycerol alone stimulated movement,  
153 but cysteine did not (Fig 5). Glycerol replaced glucose for strains J1 and UTI89 (Fig 6). In  
154 summary, glycerol lowered the glucose requirement, and could replace glucose for the two  
155 strains with flagella-mediated surface motility.

156 **Supplementation with other sugars.** Our results suggest that surface motility requires a  
157 carbohydrate (Fig 2). Glucose and glycerol are not abundant in urine, but urine does contain  
158 carbohydrates. Single urinary carbohydrates are under 0.4 mM, except for glucuronate (~2 mM  
159 in urine), but the total urinary carbohydrate content is substantial (>4 mM) (9). A mixture of  
160 glucuronate (5 mM), gluconate (1 mM), glycerol (1 mM), glucose (1 mM), mannitol (1 mM),  
161 and sorbitol (1 mM) did not support the motility of strain J1 but supported motility of UTI89  
162 weakly after 24 hours (the inner circle in Fig 7A). The appearance of a hypermotile  
163 uropathogenic variant was apparent after 24 hours, and the variant moved to the edge of the plate  
164 after 48 hours (Fig 7B). Cells from the edge of the plate were isolated and shown to move  
165 without any carbohydrate (Fig 7C). A possible explanation for enhanced motility is an insertion  
166 in the promoter region of the *flhDC* operon (11, 29). PCR analysis of this region showed no  
167 insertion upstream from the *flhDC* structural genes (not shown). These variants were not further  
168 characterized. In summary, motility without a carbohydrate is a property of a UTI89 variant, not  
169 a property of parental UTI89.

170

171 **Glucose is required for type I pili-mediated surface motility**



172 We observed surface motility of W3110 on plates with 0.25% agar, which is used to  
173 monitor swimming motility, but only if the medium contained glucose (Fig 8). In the absence of  
174 glucose, W3110 swam into plates containing 0.25% agar, and such movement required flagella  
175 (FliC) (Fig 8). In the presence of glucose, W3110 moved on the surface, and this movement  
176 required pili (FimA) (Fig 8).

177 MG1655 is a nonpathogenic strain of *E. coli* that, like J1, has an IS1 element 106 bases  
178 upstream from the *flhDC* transcriptional start site that increases flagella synthesis. MG1655  
179 swam into 0.25% agar plates with or without glucose (Fig 8). Without glucose, MG1655  $\Delta$ *fliC*  
180 did not swim, but with glucose this mutant moved on the surface (Fig 8). J1 exhibited the same  
181 properties (not shown). The same phenotype for two different strains shows that properties are  
182 not strain dependent.

183 Pathogenic UTI89 swam into a plate with 0.25% agar, with or without glucose, and this  
184 movement required flagella (Fig 8). Swimming with glucose is unexpected, since glucose should  
185 prevent cyclic AMP synthesis which is required for flagella synthesis (30). However, we have  
186 shown that glucose does not prevent flagella synthesis in several pathogenic *E. coli* strains,  
187 which shows that the absence of a glucose effect is not strain dependent (11). UTI89  $\Delta$ *fliC*,  
188 which lacks flagella, moved a little on the surface in the presence of glucose (Fig 8). This surface  
189 movement required pili because UTI89  $\Delta$ *fliC*  $\Delta$ *fimA* failed to move (11). In summary, glucose  
190 promotes surface movement in strains lacking flagella.

191 We examined surface motility with 0.45% agar for W3110, MG1655, and UTI89  
192 derivatives with a deletion of *fliC* which forces these strains to move with pili. ( $\Delta$ *fliC*  $\Delta$ *fimA*  
193 double mutants of these strains do not move (11)). All three strains moved well with 0.5%  
194 glucose, but not with 0.5% glycerol (Fig 9A).

195           The glucose-dependent stimulation of movement predicts that pili-dependent surface  
196 motility will not require cyclic-AMP (cAMP), because glucose inhibits cAMP synthesis.  
197 Furthermore, CRP-cAMP represses *fimB* expression, which is part of the complex control of pili  
198 synthesis (31). Such control predicts that loss of CRP or cyclic AMP will not affect surface  
199 motility. As expected, *crp* and *cya* mutants of W3110 still exhibited surface motility, although  
200 the pattern of motility was altered (Fig 9B). Electron microscopy verified that the  $\Delta$ *cya* mutant  
201 had pili, but not flagella (Fig 9C).

202

### 203 **The requirement for tryptone and the TCA cycle**

204           Surface motility medium contains 1% tryptone. For all types of strains, 0.75% tryptone  
205 supported movement to the same extent as 1% tryptone (Fig 10). For J1 and UTI89, the bacteria  
206 on the 0.75% tryptone plate were not as dense as on the 1% tryptone plate, which suggests less  
207 growth (not shown). For all strains, 0.5% tryptone supported substantially less motility, and  
208 0.25% tryptone did not support movement (Fig 10). The tryptone requirement does not  
209 distinguish between pili-dependent and flagella-dependent strains.

210           Tryptone is an enzymatic digest of casein that consists mostly of amino acids, which can  
211 function as energy sources and biosynthetic precursors. Amino acid degradation in complex  
212 mixtures is poorly characterized, but if amino acids are energy sources, then their degradation  
213 requires the tricarboxylic acid (TCA) cycle, electron transport, and oxidative phosphorylation  
214 (32). Deletion of the following genes of W3110 had little or no effect on surface motility: *nuoC*,  
215 *glpD*, *glpA*, *poxB*, *hyaA*, *fdhF*, and *menA* (Fig 11). Movement was substantially impaired, but not  
216 eliminated, for mutants with deletions of *cyoA*, *ubiF*, *gltA*, *acnB*, *sucC*, *sucD*, *sdhA*, and *sdhB*  
217 (Fig 11). *lpd*, *sucA*, and *sucB* mutants could not move (Fig 11). The latter three mutants cannot

218 generate succinyl-CoA, which is required for *meso*-diaminopimelate synthesis, an essential  
219 component of peptidoglycan that cannot be synthesized from components in the medium.

220 For the flagella-dependent hypermotile J1 and uropathogenic UTI89, we examined  
221 mutants lacking genes for three representative enzymes of the TCA cycle: *gltA*, *sucC*, and *sdhA*.  
222 None of the three UTI89 mutants exhibited surface motility (Fig 12), which suggests that  
223 flagella-dependent movement requires the TCA cycle and oxidative phosphorylation. Such a  
224 result is not unexpected, since flagella rotation requires a proton motive force. In contrast, the J1  
225 mutants moved, albeit poorly, and unexpectedly formed a ringed pattern like its parental W3110  
226 (Fig 12). Such a pattern is more consistent with the pili-dependent movement of W3110, and  
227 electron microscopy showed that these mutants were piliated (Fig 12). These results suggest that  
228 a mutational block in the TCA cycle prevents flagella synthesis and results in pili synthesis in  
229 strain J1.

230

### 231 **pH of medium after motility assays**

232 The pathway requirements for motility are clearly different between strains. Glycolysis  
233 through PfkA is required for motility of W3110 and J1, but not for UTI89. Loss of the TCA  
234 cycle affects all three strains, but the effect is greatest in UTI89. The motility medium is  
235 essentially unbuffered, which means that reliance on different energy-generating pathways will  
236 have different effects on medium pH: glycolysis will generate acids, and amino acid degradation  
237 via the TCA cycle will alkalinize the medium due to ammonia formation. The pH at the  
238 movement edge for W3110, J1, and UTI89 was 4.5-5.0, 5.5-6.0, and 6.0-6.5, respectively (not  
239 shown). The pH indicates the relative dependence of acid-generating carbohydrate degradation

240 versus ammonia-generating amino acid degradation for these strains: W3110 is more dependent  
241 on glycolysis, whereas UTI89 is more dependent on the TCA cycle.

242

## 243 **DISCUSSION**

244 Our goals were to determine the nutrient and pathway requirements for the surface  
245 motility of non-pathogenic *E. coli* that used pili or flagella for movement, and to compare these  
246 requirements with those of a uropathogen. The strains examined were W3110, which exhibited  
247 pili-dependent movement, and J1 and UTI89, which showed flagella-dependent movement. J1 is  
248 a hypermotile derivative of W3110. The results are summarized in Tables 1 and 2. *E. coli* pili-  
249 mediated motility has not been thoroughly characterized, but its requirements differ substantially  
250 from those for the flagella-dependent strains which confirms that pili-dependent *E. coli* surface  
251 motility is a distinct from flagella-dependent *E. coli* motility.

252 A potential problem with our analysis is the possibility that P1 transduction, which was  
253 used to construct the mutants, carried a mutation in a cotransduced gene that caused the  
254 phenotype. Complementation is used to address this issue, but control plasmids negatively  
255 affected motility. Instead, the conclusions are based on deletions of multiple genes in the  
256 pathways of glucose transport, glucose catabolism via the oxidative pentose pathway and Entner-  
257 Doudoroff pathways, acetogenesis, and the TCA cycle. In all cases, when loss of one enzyme of  
258 a pathway impaired movement, loss of other enzymes of the same pathway also impaired  
259 movement.

260 **Energy metabolism during surface motility.** Flagella-dependent movement of UTI89  
261 and J1 required the TCA cycle. For UTI89, the requirement for the TCA cycle was absolute,  
262 while for J1 the requirement appeared to be partial. However, the J1 mutants with TCA cycle

263 defects used pili for movement. Our interpretation is that J1 flagella-dependent surface motility  
264 absolutely requires the TCA cycle, but under pressure to acquire nutrients can generate variants  
265 that utilize pili for movement.

266         Based on several observations, flagellar-dependent motility preferentially utilized amino  
267 acids degraded via the TCA cycle over carbohydrate degradation via glycolysis. First, movement  
268 of the flagella-dependent strains resulted in medium alkalization, which can only result from  
269 deamination of amino acids. Second, both flagella-dependent strains had a lower glucose  
270 requirement than the pili-dependent W3110. Finally, J1 required fewer genes of carbohydrate  
271 transport and metabolism than parental W3110. Despite the greater reliance on amino acids and  
272 the TCA cycle, both J1 and UTI89 still required a carbohydrate.

273         Pili-dependent motility of W3110 was more dependent on carbohydrate degradation and  
274 less dependent on the TCA cycle, although mutants with defects in the TCA cycle were less  
275 motile. The evidence for this conclusion is (a) greater medium acidification for W3110 than for  
276 J1 and UTI89, and (b) defects in a greater number of glycolytic pathways affected W3110  
277 motility. These results suggest that pili-dependent movement is more dependent on ATP from  
278 carbohydrate catabolism. Perhaps intracellular ATP can control the conformational states of type  
279 1 pili, which could contribute to a form of motility (33).

280         In summary, flagella-dependent motility requires the TCA cycle, oxidative  
281 phosphorylation, and the proton motive force, while pili-dependent motility has a greater reliance  
282 on ATP from glycolysis. This conclusion is consistent with observations on *S. enterica* swarming  
283 cells which are morphologically and metabolically distinct with vegetative swimming cells (34).  
284 Although swarming cells require glucose, almost all enzymes of glycolysis were lower while  
285 several TCA cycle proteins were higher during swarming (34).

286           **Comparison of requirements for the two strains with flagella-dependent movement.**

287   The common requirements for J1 and UTI89 were glucose, albeit less glucose than the pili  
288   dependent W3110, and flagella synthesis in the presence of glucose, which is not a property of  
289   frequently studied *E. coli* lab strains. Despite these similarities, J1 and UTI89 also differed. J1,  
290   but not UTI89, required glycolysis through PfkA. In this respect, J1 is like parental W3110.  
291   Conversely, UTI89, but not J1, was affected by loss of the oxidative branch of the pentose cycle,  
292   the ED pathway, and acetogenic enzymes. Given their reduced requirement for glucose  
293   compared to W3110, carbohydrate metabolism may be important for one of more biosynthetic  
294   intermediate and the particular glycolytic pathway used for synthesis of the intermediate may not  
295   be important. For example, the specific pathway that generates triose-phosphates, e.g., the EMP  
296   vs ED pathway, may not be important if triose-phosphates are made. Another explanation for the  
297   differences between J1 and UTI89 is that the pathways used by the latter are an adaptation to the  
298   urinary tract milieu.

299           **Glucose transport during surface motility.** Glucose transport in lab strains of *E. coli*  
300   requires PtsI (enzyme I), PtsH (the Hpr protein), and PtsG (the glucose-specific enzyme IIBC  
301   component). W3110 motility required all three components. J1 motility did not require any of  
302   these components, but still required a carbohydrate. A minor non-PTS glucose uptake system  
303   (e.g., GalP (35)) may be sufficient for J1's reduced carbohydrate requirement. UTI89 did not  
304   require PtsG but at least partially required PtsH and PtsI. An additional glucose transport  
305   mechanism could explain the nonessentiality of PtsG in UTI89. PtsG-independent glucose  
306   transport could also account for flagella synthesis in the presence of glucose, if such a transport  
307   system does not control cyclic AMP synthesis. Glucose-independent flagella synthesis has also  
308   been observed for the UPEC strains PNK-004 and PNK-006 (11). PtsG-independent glucose

309 transport and flagella synthesis in the presence of glucose, may be adaptations to the urinary tract  
310 environment.

311 **Comparing metabolic requirements for surface motility and UTIs.** The pathway  
312 requirement for UTIs has been extensively studied with the uropathogen CFT073 in a  
313 competitive fitness mouse model (18, 36). The EMP pathway was dispensable for bladder  
314 infection but was required for kidney infection. On the other hand, CFT073 mutants lacking  
315 tricarboxylic acid (TCA) cycle, acetogenesis and gluconeogenesis enzymes were less fit in a  
316 murine model (18, 36). Like a CFT073 infection, UTI89 surface motility required the TCA cycle  
317 and acetogenesis, and did not require PfkA. However, a major difference is that a CFT073  
318 infection requires gluconeogenesis (Pck), but UTI surface motility did not.

319 These and other results led to the conclusions that a CFT073 infection required amino  
320 acid catabolism via the TCA cycle, but not carbohydrate catabolism via PfkA (18). However, the  
321 requirements for UTI89 motility is consistent with a more complex explanation for CFT073  
322 infectivity that accounts for some unusual phenotypes. While not requiring PfkA, UTI89 motility  
323 required a carbohydrate. This conclusion is based on failure to move without a carbohydrate and  
324 that only a derivative of UTI89 could move without a carbohydrate. Furthermore, some results  
325 from study of CFT073 infectivity also suggest that carbohydrate metabolism is important. While  
326 a *pfkA* deletion had no effect on competitive fitness in mice, a *pfkA pfkB* double mutant  
327 outcompeted the parental CFT073 strain in the bladder which suggests that glycolysis via  
328 phosphofructokinase is detrimental (37). Howeverm this result implies that carbohydrates are  
329 degraded. Furthermore, other evidence suggests that carbohydrate metabolism is important for  
330 UTIs (18). For example, genes for lactose and sorbitol catabolism are induced in intracellular  
331 bacterial communities during UTIs and their loss reduced UTI89 virulence (38), and loss of the

332 Vpe carbohydrate permease, which transports an unknown carbohydrate, impaired virulence of  
333 the uropathogen AL511 (39). We propose that carbohydrate metabolism for both UTI89 and  
334 CFT073 occurs via PfkA-independent pathways. For example, loss of ED pathway enzymes  
335 results in defective UTI89 motility which implies that the ED pathway contributes to glucose  
336 metabolism. We note that during a UTI, bacteria will grow in urine, which contains low amounts  
337 of numerous carbohydrate that are not degraded via PfkA (18).

338 In summary, the metabolic requirements for UTI89 motility, which can be assessed in a  
339 defined and controlled environment, can provide insight into metabolism of uropathogens,  
340 including CFT073. The requirements for the TCA cycle and acetogenesis and lack of a  
341 requirement for PfkA for both UTI89 motility and CFT073 infectivity may suggest a UPEC-  
342 specific metabolism that is an adaptation to the urinary tract environment. However, UTI89  
343 motility, but not CFT073 infectivity, requires the ED pathway, and CFT073 infectivity, but not  
344 UTI89 motility, required gluconeogenesis. These differences may be a function of either varied  
345 requirements for surface motility and infection or strain-specific differences. Strain-specific  
346 differences should not be considered surprising, since each UPEC strain must adapt to a different  
347 urinary tract environment. UPEC are becoming increasingly antibiotic resistant. The  
348 identification of UPEC-specific enzymes or processes, that do not show strain-to-strain  
349 variations, possibly a UPEC-specific glucose transporter, could be crucial for identification of  
350 targets for development of antibacterial therapies.

351

## 352 **MATERIAL AND METHODS**

### 353 **Bacterial strains**



354 *E. coli* W3110, hypermotile J1 (derived from W3110), NPEC strain MG1655, and  
355 uropathogenic UTI89 were used as parental strains. Table 3 lists the derivatives of these strains  
356 used in the study. The mutant alleles came from the Keio strain collection and contained  
357 deletions in which a kanamycin resistance gene replaced the gene of interest (40). The  
358 deletion/insertion was transferred by P1 transduction into the various parental strains (41).  
359 UTI89 was the uropathogen studied because of the ease of transduction. Other pathogenic strains  
360 can be transduced with P1, but the transduction procedure is more complex.

361 The kanamycin resistance gene was left in place, which implies the possibility of  
362 polarity. The conclusions of this work do not depend on whether gene expression is polar past  
363 the insertion. However, for several reasons, potential effects of polarity are likely to be minor.  
364 First, genes downstream from the insertion can be expressed from the resistance gene, although  
365 expression may not be the same as in the intact operon. Second, the insertion should not have  
366 downstream effects on the following monocistronic genes: *acnB*, *crp*, *cyaA*, *fdhF*, *fliC*, *glpD*,  
367 *gltA*, *menA*, *pck*, *pfkA*, *ptsG*, *ubiF*, and *zwf*. Third, insertions in *eda*, *lpd*, *pta*, *ptsI*, *sdhB*, and  
368 *sucD* are in the last gene of an operon and should not have a polar effect. Fourth, insertions in  
369 *cyoA*, *fimA*, *glpA*, *hyaA*, and *nuoC* were intended to eliminate a multiprotein complex: polarity is  
370 irrelevant. Finally, the insertion of the following genes may affect downstream genes but will  
371 only affect genes coding for proteins of the same pathway: *ackA* of the *ackA-pta* operon and  
372 acetogenesis, *edd* of the *edd-eda* operon and the ED pathway, *ptsH* of the *ptsHI* operon and  
373 carbohydrate transport, and the *suc* and *sdh* genes of their respective operons of the TCA cycle.

#### 374 **Media and growth conditions**

375 For growth on solid medium, strains were streaked on LB agar plates (10 g/l tryptone, 5  
376 g/l yeast extract, 5 g/l NaCl, 15 g/l Difco agar) and incubated at 37°C for 15 h. For liquid

377 cultures, bacteria were grown in LB broth with 25 µg /ml kanamycin (when appropriate) at 37° C  
378 with aeration (250 rpm) for 12 h.

379

## 380 **Motility Assays**

381 Surface motility. Bacterial strains were streaked on an LB agar plate. After overnight  
382 growth, a single colony was inoculated in 1 ml of swarm medium: 1% tryptone, 0.25% NaCl,  
383 and 0.5% glucose and incubated at 37° C for 6 hr with aeration. Surface motility plates (swarm  
384 medium with 0.45% Eiken agar) were dried at room temperature for 4-5 hr after pouring.  
385 Changes to glucose and tryptone concentrations are indicated in the Results section. The motility  
386 plates did not contain antibiotics. One microliter from a 6 hr culture was inoculated at the center  
387 of the surface motility plate. Plates were placed in a humid incubator set at 33° C for  
388 nonpathogenic strains or at 37°C for UPEC strains, and surface motility was documented at 36  
389 hours. Assays for the nonpathogenic strains were conducted at 33° C to ensure reproducibility:  
390 assays at 37° C were highly variable for NPEC strains because cells started moving at different  
391 times. Assays at 37° C for W3110 frequently result in generation of hypermotile variants. All  
392 assays were performed at least three times. Surface motility was extremely sensitive to  
393 conditions. Motility of the parental controls depended on the batch of the plates; for example,  
394 compare the results for parental W3110 in Figs 2 and 3. Motility of W3110 stopped if plates  
395 were removed from the incubator and examined for several minutes.

396 Swimming motility. Bacterial strains were streaked on LB, and a single colony was  
397 inoculated into 1 ml of swarm medium and grown for 6 h. Swim plates (1% tryptone, 0.25%  
398 NaCl, 0.25% Eiken agar) were stab inoculated at the center with 1 µl from the 6 hr culture and  
399 incubated at 33° C for 16 hr in a humid incubator. All assays were performed in triplicate.

400

### 401 **Electron microscopy**

402           Cells from surface motility plates were collected from the edge of movement and fixed  
403 with 2.5% glutaraldehyde. Bacteria were absorbed onto Foamvar carbon-coated copper grids for  
404 1 min. Grids were washed with distilled water and stained with 1% phosphotungstic acid for 30  
405 s. 500-1000 cells were observed before choosing what to record. Samples were viewed on a  
406 JEOL 1200 EX transmission electron microscope at UT Southwestern Medical Center.

407

### 408 **PCR amplification of the *flhDC* promoter region**

409           The *flhDC* promoter region was PCR amplified using FlhDp forward and reverse primers  
410 as described (42). The PCR product was then subjected to gel electrophoresis in a 0.8% agarose  
411 gel at 130 V for 30 minutes.

412

### 413 **pH of medium after motility.**

414           pH paper was placed directly on the plate.

415

### 416 **ACKNOWLEDGEMENTS**

417 This work was supported in part by a UT Dallas Collaborative Biomedical Research Award grant  
418 program. The electron microscopy was performed at UT Southwestern which is supported by  
419 NIH grant 1S10OD021685-01A1.

420

421 **REFERENCES**

- 422 1. **Kearns DB.** 2010. A field guide to bacterial swarming motility. *Nat Rev Microbiol*  
423 **8**:634-644.
- 424 2. **Henrichsen J.** 1972. Bacterial surface translocation: a survey and a classification.  
425 *Bacteriol Rev* **36**:478-503.
- 426 3. **Harshey RM, Matsuyama T.** 1994. Dimorphic transition in *Escherichia coli* and  
427 *Salmonella typhimurium*: surface-induced differentiation into hyperflagellate swarmer  
428 cells. *Proc Natl Acad Sci U S A* **91**:8631-8635.
- 429 4. **Allison C, Lai HC, Hughes C.** 1992. Co-ordinate expression of virulence genes during  
430 swarm-cell differentiation and population migration of *Proteus mirabilis*. *Mol Microbiol*  
431 **6**:1583-1591.
- 432 5. **Ammendola A, Geisenberger O, Andersen JB, Givskov M, Schleifer KH, Eberl L.**  
433 1998. *Serratia liquefaciens* swarm cells exhibit enhanced resistance to predation by  
434 *Tetrahymena* sp. *FEMS Microbiol Lett* **164**:69-75.
- 435 6. **Lai S, Tremblay J, Deziel E.** 2009. Swarming motility: a multicellular behaviour  
436 conferring antimicrobial resistance. *Environ Microbiol* **11**:126-136.
- 437 7. **Kim W, Killam T, Sood V, Surette MG.** 2003. Swarm-cell differentiation in  
438 *Salmonella enterica* serovar Typhimurium results in elevated resistance to multiple  
439 antibiotics. *J Bacteriol* **185**:3111-3117.
- 440 8. **Inoue T, Shingaki R, Hirose S, Waki K, Mori H, Fukui K.** 2007. Genome-wide  
441 screening of genes required for swarming motility in *Escherichia coli* K-12. *J Bacteriol*  
442 **189**:950-957.

- 443 9. **Lane MC, Simms AN, Mobley HL.** 2007. Complex interplay between type 1 fimbrial  
444 expression and flagellum-mediated motility of uropathogenic *Escherichia coli*. *J*  
445 *Bacteriol* **189**:5523-5533.
- 446 10. **Saini S, Slauch JM, Aldridge PD, Rao CV.** 2010. Role of cross talk in regulating the  
447 dynamic expression of the flagellar *Salmonella* pathogenicity island 1 and type 1 fimbrial  
448 genes. *J Bacteriol* **192**:5767-5777.
- 449 11. **Ambagaspitiye S, Sudarshan S, Hogins J, McDill P, De Nisco NJ, Zimmern PE,**  
450 **Reitzer L.** 2019. Fimbriae and flagella mediated surface motility and the effect of  
451 glucose on nonpathogenic and uropathogenic *Escherichia coli* BioRxiv  
452 <https://doi.org/10.1101/840991>.
- 453 12. **Stamm WE, Norrby SR.** 2001. Urinary tract infections: disease panorama and  
454 challenges. *J Infect Dis* **183 Suppl 1**:S1-4.
- 455 13. **Foxman B.** 2010. The epidemiology of urinary tract infection. *Nat Rev Urol* **7**:653-660.
- 456 14. **Flores-Mireles AL, Walker JN, Caparon M, Hultgren SJ.** 2015. Urinary tract  
457 infections: epidemiology, mechanisms of infection and treatment options. *Nat Rev*  
458 *Microbiol* **13**:269-284.
- 459 15. **Schulz WA.** 2011. Uropathogenic bacteria leave a mark. *Lab Invest* **91**:816-818.
- 460 16. **Miotla P, Romanek-Piva K, Bogusiewicz M, Markut-Miotla E, Adamiak A, Wrobel**  
461 **A, Zebrowska M, Wawrysiuk S, Mendyk K, Rechberger E, Jakubczak A,**  
462 **Rechberger T.** 2017. Antimicrobial resistance patterns in women with positive urine  
463 culture: does menopausal status make a significant difference? *Biomed Res Int*  
464 **2017**:4192908.

- 465 17. **Wiles TJ, Kulesus RR, Mulvey MA.** 2008. Origins and virulence mechanisms of  
466 uropathogenic *Escherichia coli*. *Exp Mol Pathol* **85**:11-19.
- 467 18. **Reitzer L, Zimmern P.** 2020. Rapid growth and metabolism of uropathogenic  
468 *Escherichia coli* in relation to urine composition. *Clin Microbiol Rev* **33**:e00101-00119.
- 469 19. **Savageau MA.** 1983. *Escherichia coli* habitats, cell types, and molecular mechanisms of  
470 gene control. *The American Naturalist* **122**:732-744.
- 471 20. **Chang DE, Smalley DJ, Tucker DL, Leatham MP, Norris WE, Stevenson SJ,**  
472 **Anderson AB, Grissom JE, Laux DC, Cohen PS, Conway T.** 2004. Carbon nutrition  
473 of *Escherichia coli* in the mouse intestine. *Proc Natl Acad Sci U S A* **101**:7427-7432.
- 474 21. **Fabich AJ, Jones SA, Chowdhury FZ, Cernosek A, Anderson A, Smalley D,**  
475 **McHargue JW, Hightower GA, Smith JT, Autieri SM, Leatham MP, Lins JJ, Allen**  
476 **RL, Laux DC, Cohen PS, Conway T.** 2008. Comparison of carbon nutrition for  
477 pathogenic and commensal *Escherichia coli* strains in the mouse intestine. *Infect Immun*  
478 **76**:1143-1152.
- 479 22. **Lane MC, Alteri CJ, Smith SN, Mobley HL.** 2007. Expression of flagella is coincident  
480 with uropathogenic *Escherichia coli* ascension to the upper urinary tract. *Proc Natl Acad*  
481 *Sci U S A* **104**:16669-16674.
- 482 23. **Bacheller CD, Bernstein JM.** 1997. Urinary tract infections. *Med Clin North Am*  
483 **81**:719-730.
- 484 24. **Sadeghi Z, MacLennan G, Childs SJ, Zimmern PE.** 2019. Is trigonitis a neglected,  
485 imprecise, misunderstood, or forgotten diagnosis? *Low Urin Tract Symptoms* **11**:182-  
486 188.

- 487 25. **Rauprich O, Matsushita M, Weijer CJ, Siegert F, Esipov SE, Shapiro JA.** 1996.  
488 Periodic phenomena in *Proteus mirabilis* swarm colony development. *J Bacteriol*  
489 **178**:6525-6538.
- 490 26. **Seo SW, Kim D, Latif H, O'Brien EJ, Szubin R, Palsson BO.** 2014. Deciphering Fur  
491 transcriptional regulatory network highlights its complex role beyond iron metabolism in  
492 *Escherichia coli*. *Nat Commun.* **5**:4910. doi:10.1038/ncomms5910.
- 493 27. **Turnbull AL, Surette MG.** 2008. L-Cysteine is required for induced antibiotic  
494 resistance in actively swarming *Salmonella enterica* serovar Typhimurium. *Microbiology*  
495 **154**:3410-3419.
- 496 28. **Oguri T, Schneider B, Reitzer L.** 2012. Cysteine catabolism and cysteine desulphydrase  
497 (CdsH/STM0458) in *Salmonella enterica* serovar typhimurium. *J Bacteriol* **194**:4366-  
498 4376.
- 499 29. **Barker CS, Pruss BM, Matsumura P.** 2004. Increased motility of *Escherichia coli* by  
500 insertion sequence element integration into the regulatory region of the *flhD* operon. *J*  
501 *Bacteriol* **186**:7529-7537.
- 502 30. **Yokota T, Gots JS.** 1970. Requirement of adenosine 3', 5'-cyclic phosphate for flagella  
503 formation in *Escherichia coli* and *Salmonella typhimurium*. *J Bacteriol* **103**:513-516.
- 504 31. **Schwan WR.** 2011. Regulation of *fim* genes in uropathogenic *Escherichia coli*. *World J*  
505 *Clin Infect Dis* **1**:17-25.
- 506 32. **Reitzer L.** 2005. Catabolism of amino acids and related compounds. *EcoSal Plus.*  
507 **1**(2):doi:10.1128/ecosalplus.3.4.7.

- 508 33. **Hospenthal MK, Waksman G.** 2019. The remarkable biomechanical properties of the  
509 type 1 chaperone-usher pilus: A structural and molecular perspective. *Microbiol Spectr* **7**.  
510 doi:10.1128/microbiolspec.PSIB-0010-2018
- 511 34. **Kim W, Surette MG.** 2004. Metabolic differentiation in actively swarming *Salmonella*.  
512 *Mol Microbiol* **54**:702-714.
- 513 35. **Henderson PJ, Giddens RA, Jones-Mortimer MC.** 1977. Transport of galactose,  
514 glucose and their molecular analogues by *Escherichia coli* K12. *Biochem J* **162**:309-320.
- 515 36. **Alteri CJ, Smith SN, Mobley HL.** 2009. Fitness of *Escherichia coli* during urinary tract  
516 infection requires gluconeogenesis and the TCA cycle. *PLoS Pathog* **5**:e1000448.
- 517 37. **Alteri CJ, Himpel SD, Shea AE, Mobley HLT.** 2019. Flexible metabolism and  
518 suppression of latent enzymes are important for *Escherichia coli* adaptation to diverse  
519 environments within the host. *J Bacteriol* **201**:e00181-00119.
- 520 38. **Conover MS, Hadjifrangiskou M, Palermo JJ, Hibbing ME, Dodson KW, Hultgren**  
521 **SJ.** 2016. Metabolic requirements of *Escherichia coli* in intracellular bacterial  
522 communities during urinary tract infection pathogenesis. *MBio* **7**:e00104-00116.
- 523 39. **Martinez-Jehanne V, Pichon C, du Merle L, Poupel O, Cayet N, Bouchier C, Le**  
524 **Bouguenec C.** 2012. Role of the Vpe carbohydrate permease in *Escherichia coli*  
525 urovirulence and fitness *in vivo*. *Infect Immun* **80**:2655-2666.
- 526 40. **Baba T, Ara T, Hasegawa M, Takai Y, Okumura Y, Baba M, Datsenko KA, Tomita**  
527 **M, Wanner BL, Mori H.** 2006. Construction of *Escherichia coli* K-12 in-frame, single-  
528 gene knockout mutants: the Keio collection. *Mol Syst Biol* **2**:2006 0008.
- 529 41. **Miller JH.** 1972. *Experiments in Molecular Genetics*. Cold Spring Harbor Laboratory,  
530 Cold Spring Harbor, NY.



531 42. **Fahrner KA, Berg HC.** 2015. Mutations that stimulate *flhDC* expression in *Escherichia*  
532 *coli* K-12. *J Bacteriol* **197**:3087-3096.

533

| Genotype     | Pathway affected        | W3110 <sup>a</sup> | J1 <sup>a</sup> | UTI89 <sup>a</sup> | Infection model <sup>b</sup> |
|--------------|-------------------------|--------------------|-----------------|--------------------|------------------------------|
| parental     | none                    | ++                 | ++              | ++                 | +                            |
| <i>ΔptsI</i> | Glucose transport       | —                  | ++              | +                  | ND                           |
| <i>ΔptsH</i> | Glucose transport       | —                  | ++              | +                  | ND                           |
| <i>ΔptsG</i> | Glucose transport       | —                  | ++              | ++                 | ND                           |
| <i>ΔpfkA</i> | EMP glycolysis          | —                  | —               | ++                 | +                            |
| <i>Δedd</i>  | ED glycolysis           | +                  | ++              | —                  | +                            |
| <i>Δeda</i>  | ED glycolysis           | +                  | ++              | +                  | ND                           |
| <i>Δzwf</i>  | Oxidative pentose cycle | —                  | ++              | +                  | +                            |
| <i>Δpta</i>  | Acetogenesis            | ++                 | ++              | —                  | —                            |
| <i>ΔackA</i> | Acetogenesis            | ++                 | ++              | +                  | —                            |
| <i>Δpck</i>  | Gluconeogenesis         | +                  | ++              | ++                 | —                            |
| <i>ΔserB</i> | Serine synthesis        | —                  | ++              | —                  | ND                           |
| <i>ΔgltA</i> | TCA cycle               | +                  | +               | —                  | ND                           |
| <i>ΔsdhA</i> | TCA cycle               | +                  | +               | —                  | — <sup>c</sup>               |
| <i>ΔsucC</i> | TCA cycle               | +                  | +               | —                  | — <sup>c</sup>               |

534

535 **Table 1:** Summary of surface motility of mutants with defects in various pathways.

536 <sup>a</sup> The scoring is ++ for >> 70% of parental diameter; + for 30-50% of parental diameter; and —

537 for < 25% of parental diameter. Diameter assessments are qualitative because of variations from

538 batch to batch of motility assay plates.

- 539    b The results from a mouse infection model have been reviewed (18).
- 540    c These exact mutants were not tested in a mouse infection, but a deletion in the same operon
- 541    had the indicated result. ND, not determined.

| <b>Function or pathway</b>        | <b>W3110</b> | <b>J1</b>                | <b>UTI89</b> |
|-----------------------------------|--------------|--------------------------|--------------|
| Glucose transport                 | PtsG         | Not PtsG                 | Not PtsG     |
| Embden-Meyerhof-Parnas (via PfkA) | Yes          | Yes                      | No           |
| Pentose-phosphate (via Zwf)       | Yes          | No                       | Yes          |
| Entner-Doudoroff                  | Partial      | No                       | Yes          |
| TCA cycle                         | Partial      | Yes/Partial <sup>a</sup> | Yes          |

542

543 **Table 2:** Summary of pathway requirements for surface motility.

544 <sup>a</sup> Mutants of J1 lacking TCA cycle enzymes moved partially and had switched from flagella- to

545 pili-dependent movement.

| Parental Strain | Mutants constructed                                                                                                                                                                                                                                 | Parental source                       |
|-----------------|-----------------------------------------------------------------------------------------------------------------------------------------------------------------------------------------------------------------------------------------------------|---------------------------------------|
| W3110           | <i>ΔackA, ΔacnB, Δcrp, ΔcyaA, ΔcyoA, Δeda, Δedd, ΔfdhF, ΔfimA, ΔfliC, ΔfliC, ΔfimA, ΔglpA, ΔglpD, ΔgltA, ΔhyaA, Δlpd, ΔmenA, ΔnuoC, Δpck, ΔpfkA, ΔpoxB, Δpta, ΔptsG, ΔptsH, ΔptsI, ΔsdhA, ΔsdhB, ΔserB, ΔsucA, ΔsucB, ΔsucC, ΔsucD, ΔubiF, Δzwf</i> | Lab Strain                            |
| J1              | <i>ΔackA, Δeda, Δedd, ΔgltA, Δpck, ΔpfkA, Δpta, ΔptsG, ΔptsH, ΔptsI, ΔserB, ΔsdhA, ΔsucC, Δzwf</i>                                                                                                                                                  | Lab strain (derived from W3110)       |
| UTI89           | <i>ΔackA, Δeda, Δedd, ΔfliC, ΔgltA, Δpck, ΔpfkA, Δpta, ΔptsG, ΔptsH, ΔptsI, ΔserB, ΔsdhA, ΔsucC, Δzwf</i>                                                                                                                                           | Lab strain                            |
| MG1655          | <i>ΔfliC</i>                                                                                                                                                                                                                                        | Coli Genetic Stock Center (Yale Univ) |

546

547 **Table 3:** List of bacterial strains

548

**W3110**

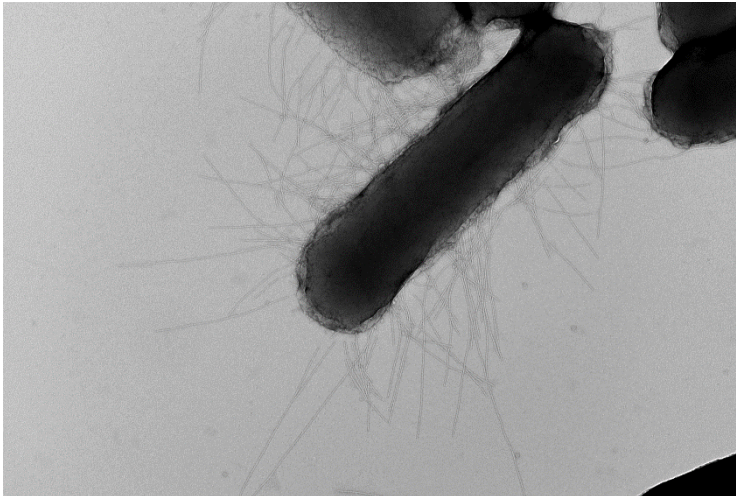

WT\_14.tif  
Print Mag: 40300x @ 7.0 in  
15:05 11/16/2018  
TEM Mode: Imaging

500 nm  
HV=120kV  
Direct Mag: 10200 x  
X:-54455.16 Y:160266.7  
UT Southwestern Medical Center EM Core Facility

Camera: BIOSPR16, Exposure: 1500 (ms) x 1 std. frames, Gain: 2, Bin: 1  
Gamma: 1.00, No Sharpening, Normal Contrast

**J1**

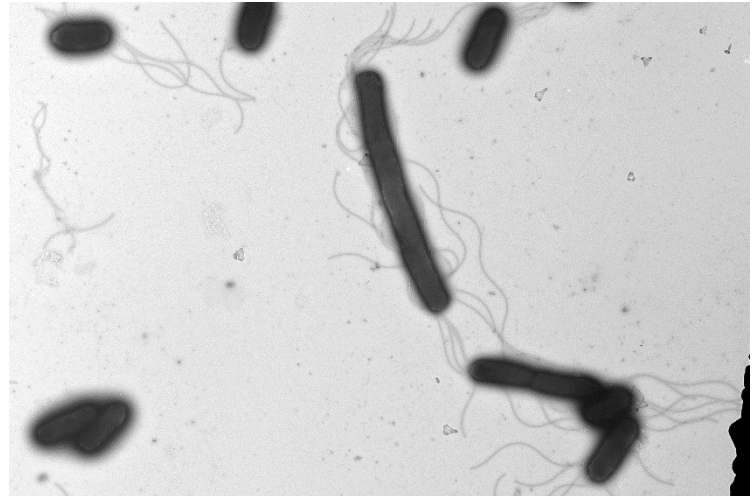

J1 (3).tif  
Print Mag: 8040x @ 7.0 in  
15:43 2/21/2019  
TEM Mode: Imaging

2 µm  
HV=120kV  
Direct Mag: 2000 x  
X:-12182.5 Y:-303467.6  
UT Southwestern Medical Center EM Core Facility

Camera: BIOSPR16, Exposure: 1500 (ms) x 1 std. frames, Gain: 2, Bin: 1  
Gamma: 1.00, No Sharpening, Normal Contrast

**UTI89**

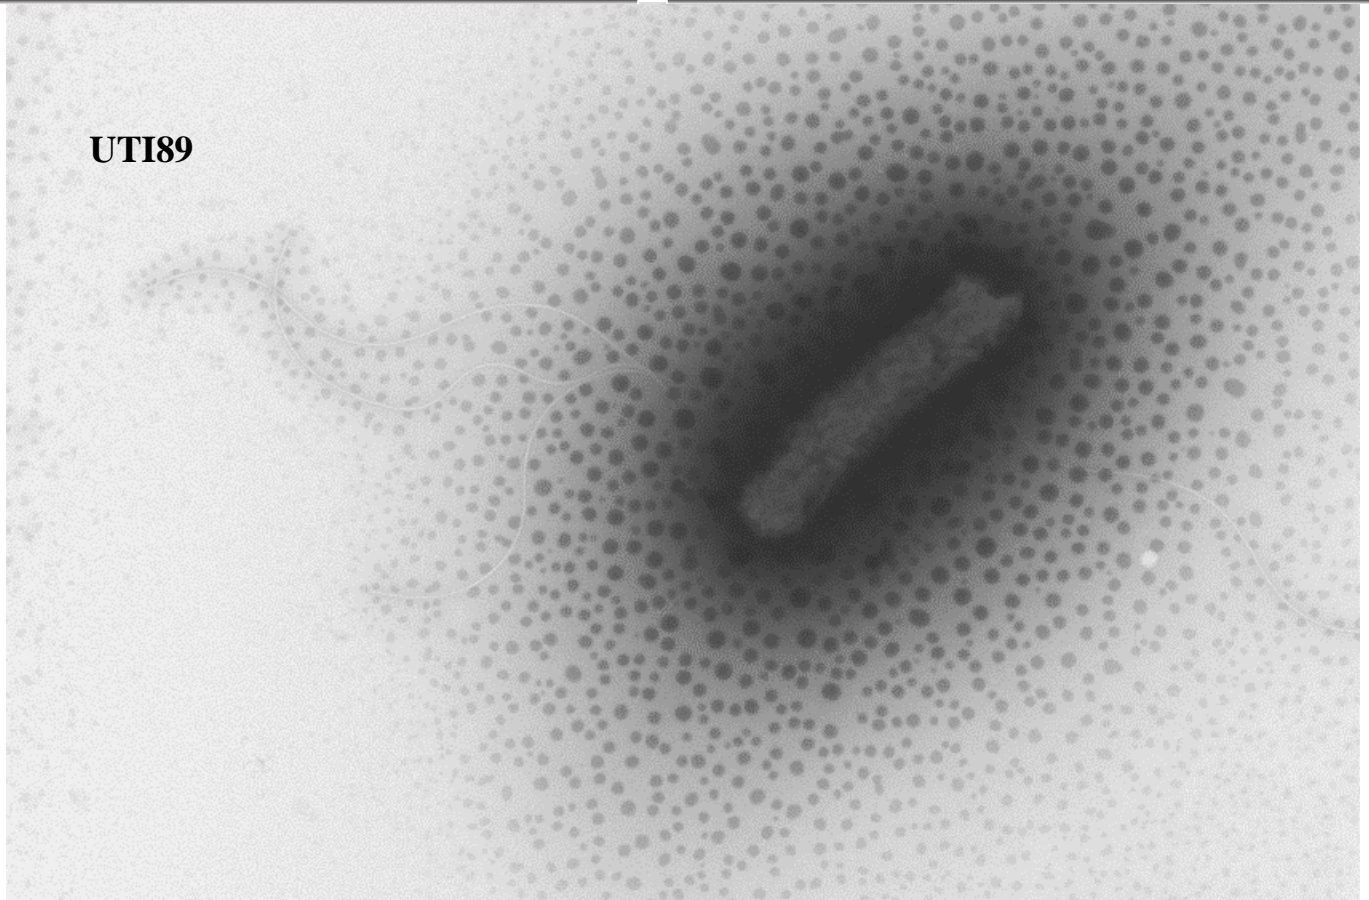

uti\_89.sp.2.tif  
Print Mag: 16000x @ 7.0 in  
15:37 1/23/2019  
TEM Mode: Imaging

1 µm  
HV=120kV  
Direct Mag: 4000 x  
X:-1026573 Y:-290633.3  
UT Southwestern Medical Center EM Core Facility

Camera: BIOSPR16, Exposure: 1500 (ms) x 1 std. frames, Gain: 2, Bin: 1  
Gamma: 1.00, No Sharpening, Normal Contrast

557 **Figure 1:** Electron microscopic images of nonpathogenic W3110 and J1, and uropathogenic  
558 UTI89. UTI89 and J1 possess flagella which are longer than the cell length, while W3110  
559 possess pili. The dots around UTI89 are typical for EM images of this strain and probably  
560 indicate the presence of exopolysaccharide. The bars for W3110, J1 and UTI89 are 0.5, 2, and 1  
561  $\mu\text{m}$ , respectively.

562

563

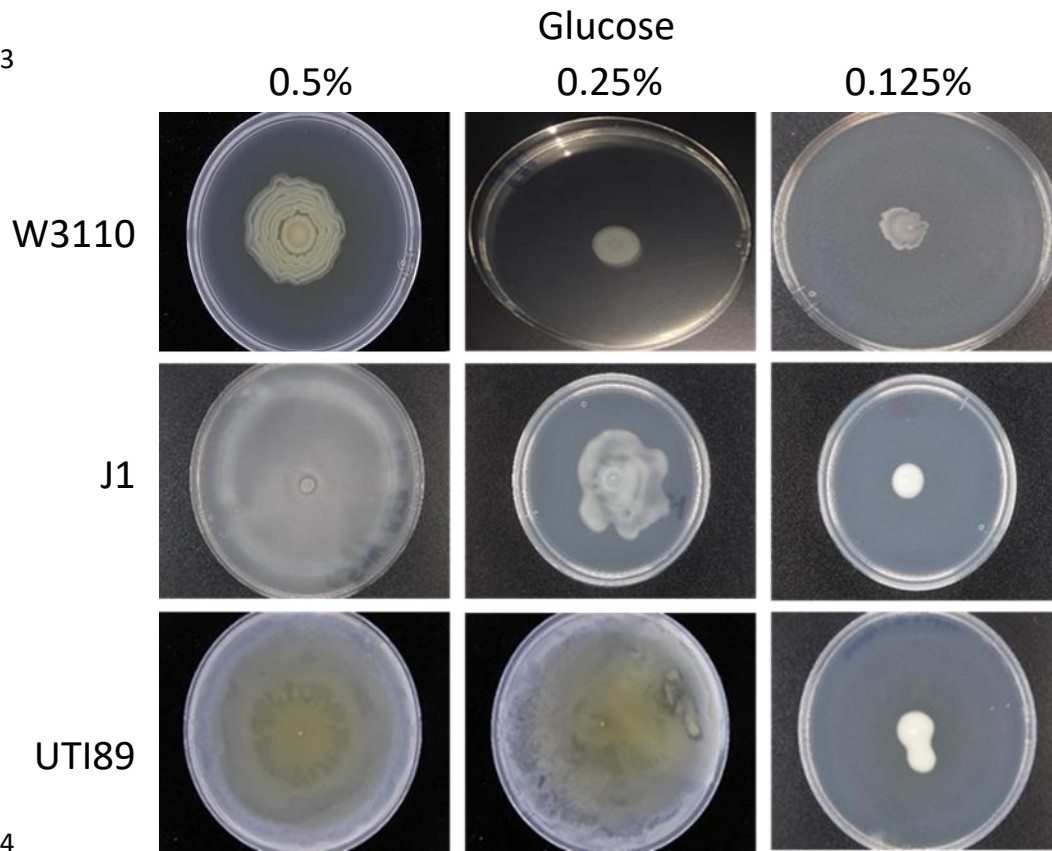

564

565

566 **Figure 2:** Concentration requirement of glucose for surface motility.



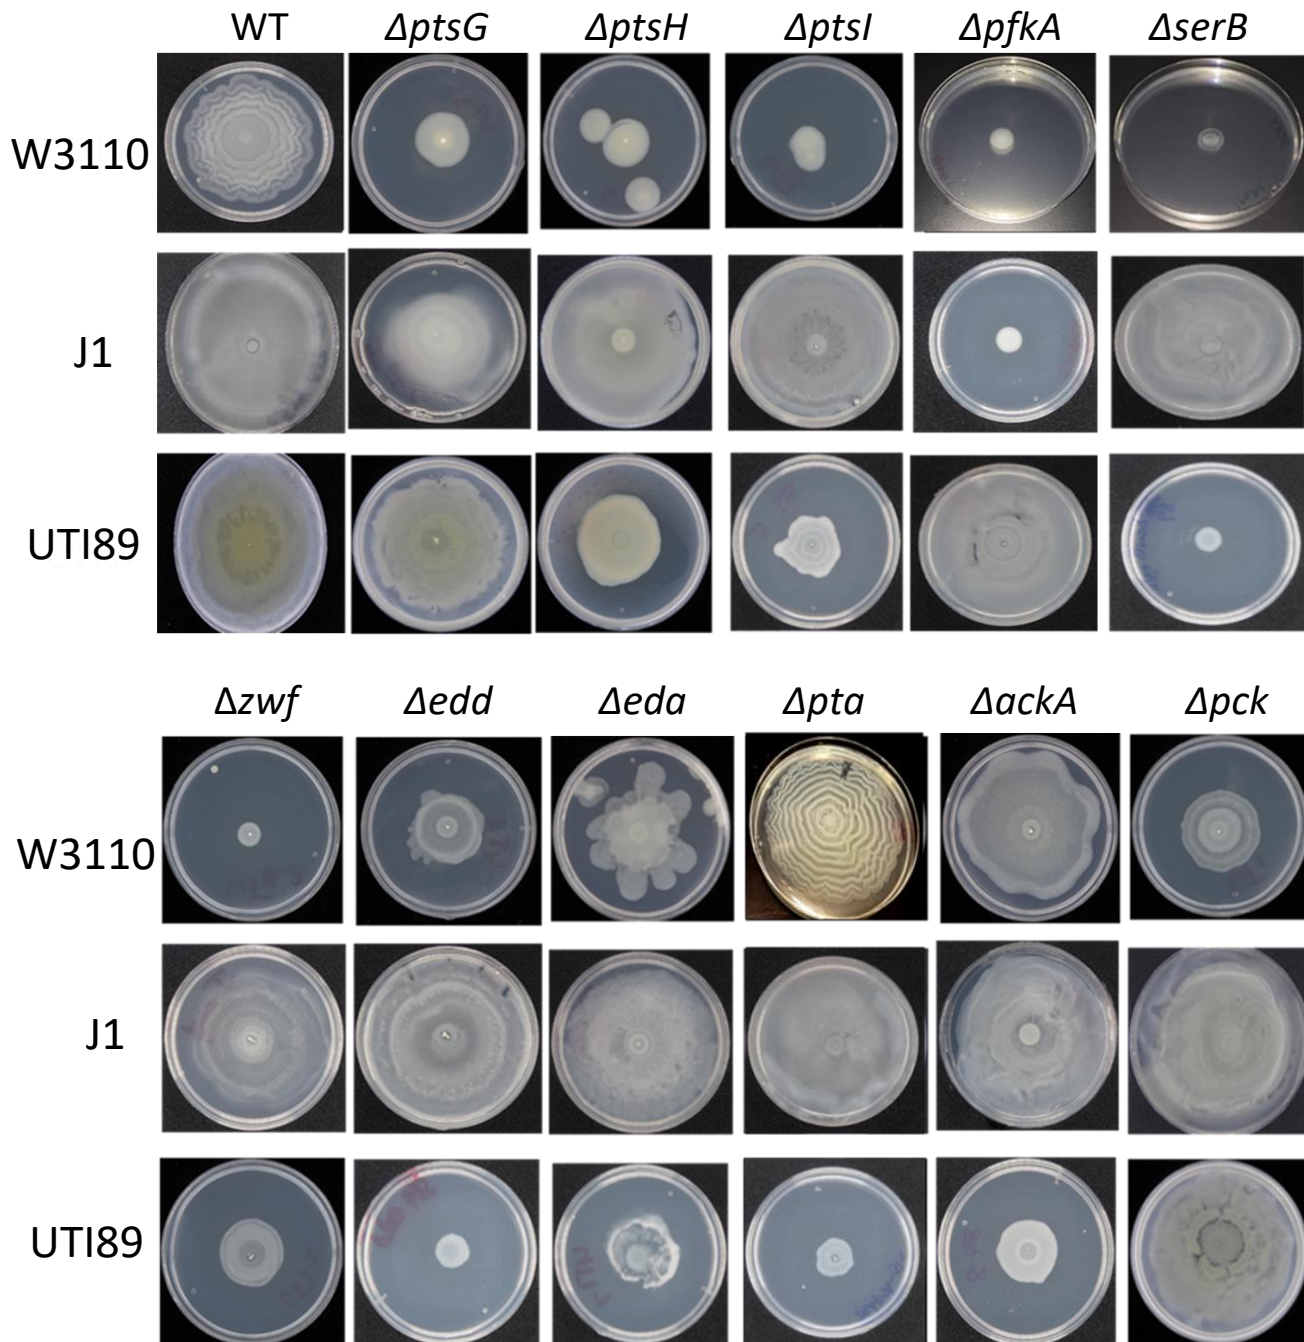

567

568 **Figure 3:** Surface motility of mutants with defects in glucose transport and pathways of  
569 carbohydrate metabolism.

570

571

572

573

574

575

576

577

578

579

580

581

582

583

584

585

586

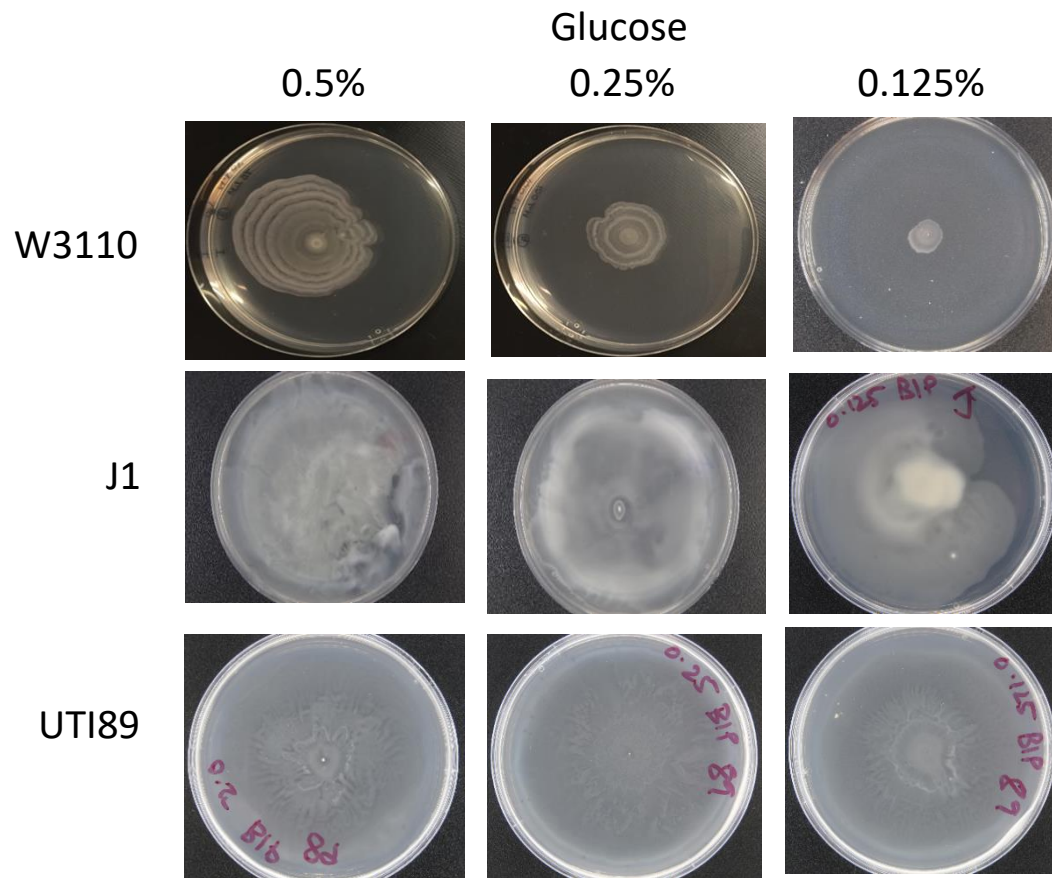

587 **Figure 4:** Surface motility of W3110, J1 and UTI89 with 100  $\mu$ M BIP and the indicated

588 concentrations of glucose.

589

590

|     |     |   |    |    |    |    |    |
|-----|-----|---|----|----|----|----|----|
| 591 | Cys | + | -- | +  | +  | +  | -- |
| 592 | Pyr | + | +  | +  | -- | -- | -- |
| 593 | Gly | + | +  | -- | +  | -- | +  |

594

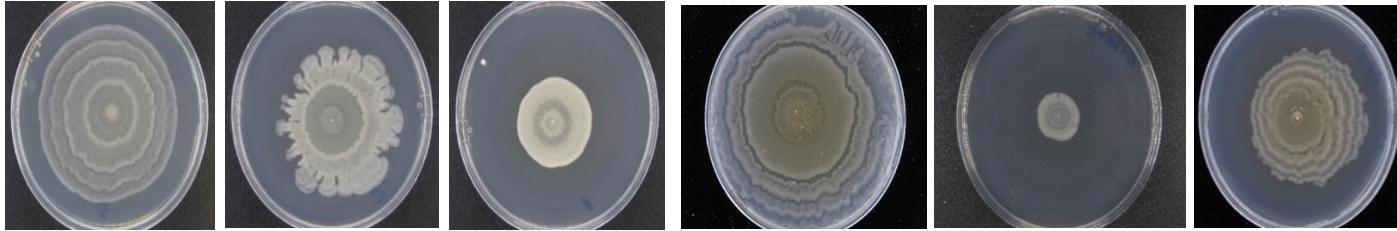

595 **Figure 5:** W3110 surface motility with cysteine, pyruvate and glycerol. The medium contained 0.125% glucose and 100  $\mu$ M BIP.

596 Cys, 2 mM cysteine; Pyr, 0.1% pyruvate; Gly, 0.1% glycerol.

597

598

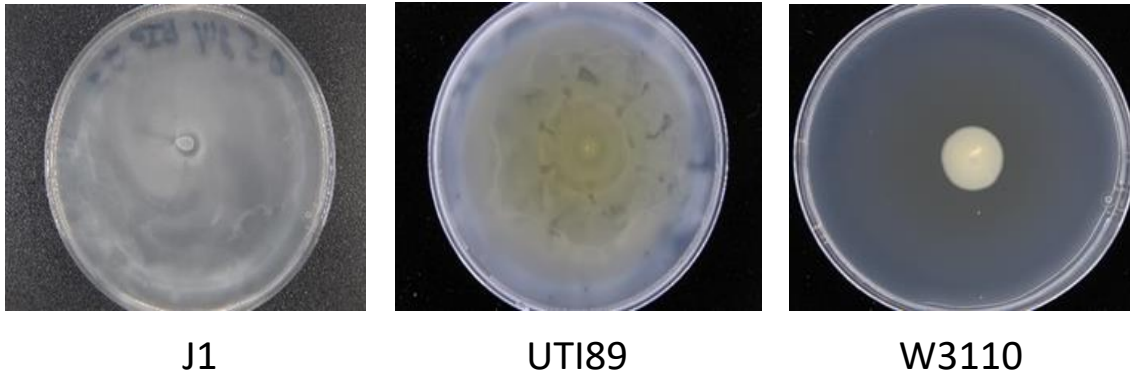

603

604 **Figure 6:** Surface motility with 0.5% glycerol instead of 0.5% glucose.

605

606

607

608

609

610

611

612

613

614

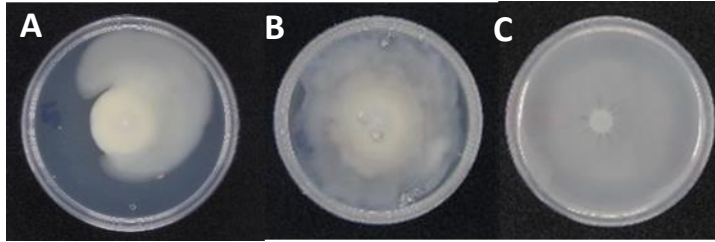

615

616 **Figure 7:** Surface motility of UTI89 with a carbohydrate mixture. The carbohydrate mixture  
617 contained 5 mM glucuronate, 1 mM gluconate, 1 mM glucose, 1 mM glycerol, 1 mM mannitol,  
618 and 1 mM sorbitol. (A) Motility for 24 hours with the carbohydrate mixture. Notice the presence  
619 of faster moving flares. (B) Motility for 48 hours with the carbohydrate mixture. (C) Cells from  
620 edge of plate B were incubated for 15 hours in the absence of any carbohydrate.

621

622

623

624

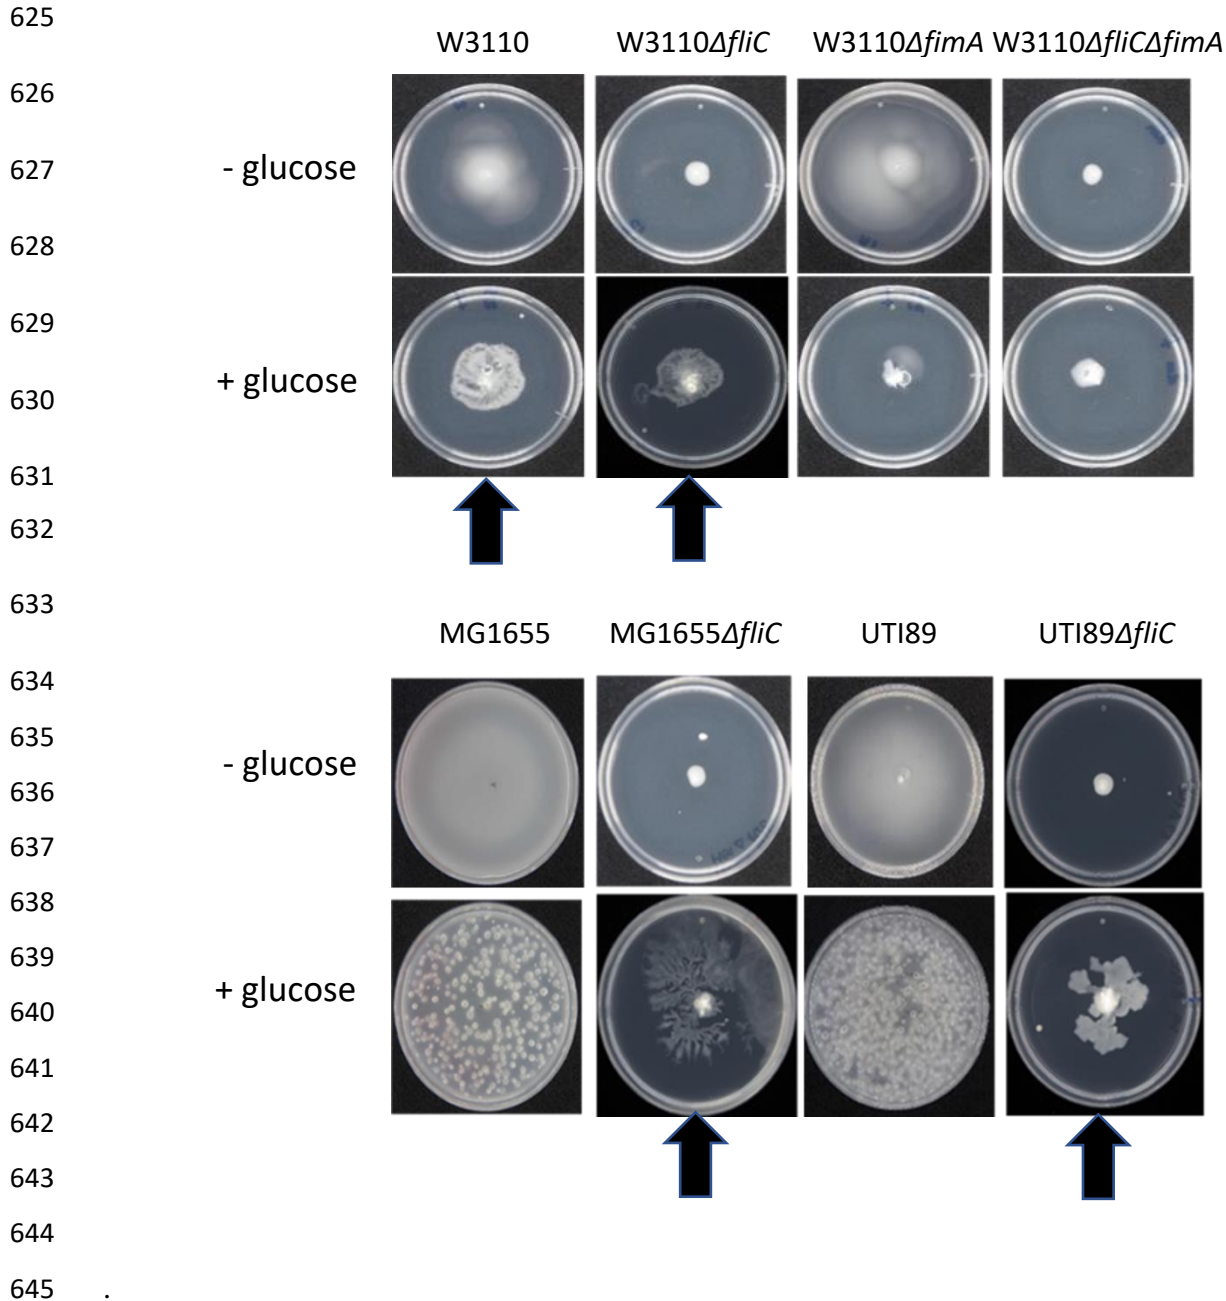

646 **Figure 8:** Motility observed in plates with 0.25% agar with and without glucose. Arrows indicate  
647 pili-mediated surface motility which is only observed in the presence of glucose. The bubbles for  
648 MG1655 and UTI89 with glucose resulted from CO<sub>2</sub> generation of bacteria that swam into the  
649 agar.

650

651

652

653

654

A

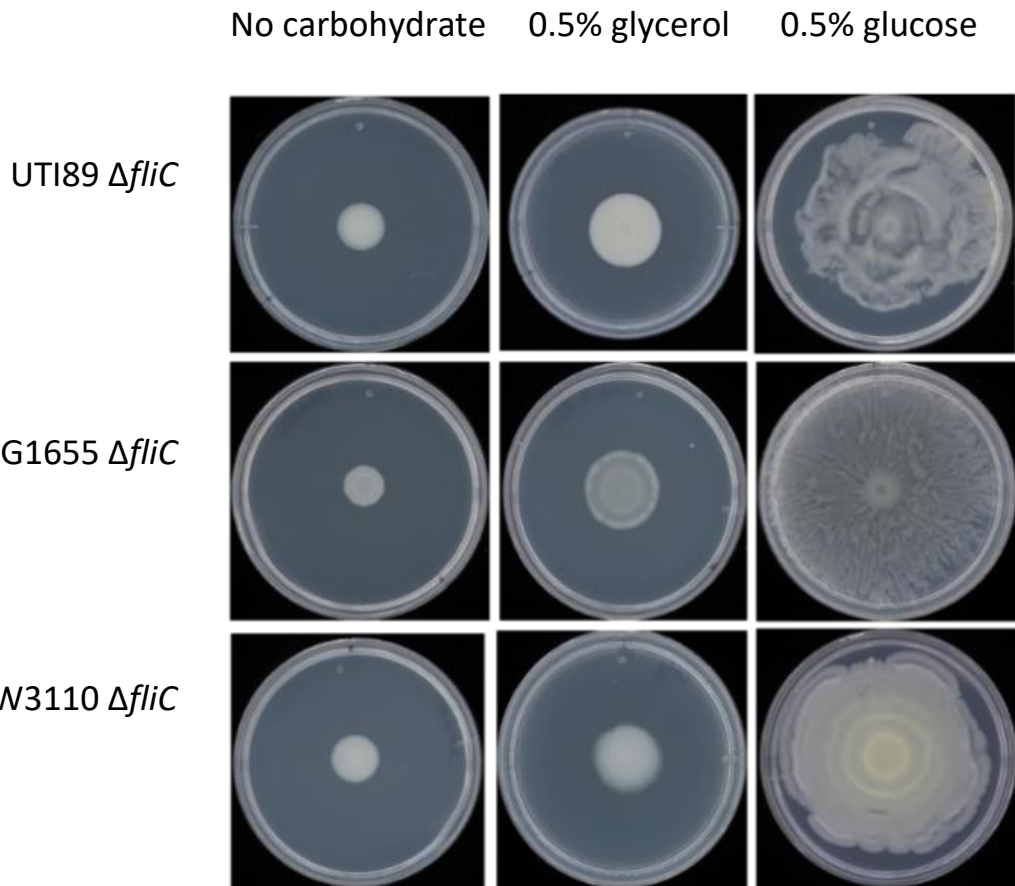

655

656

657 B

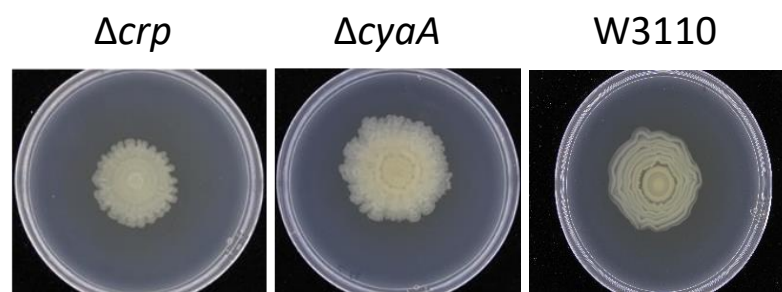

658

659

660

C

W3110  $\Delta$ *cyaA*

661

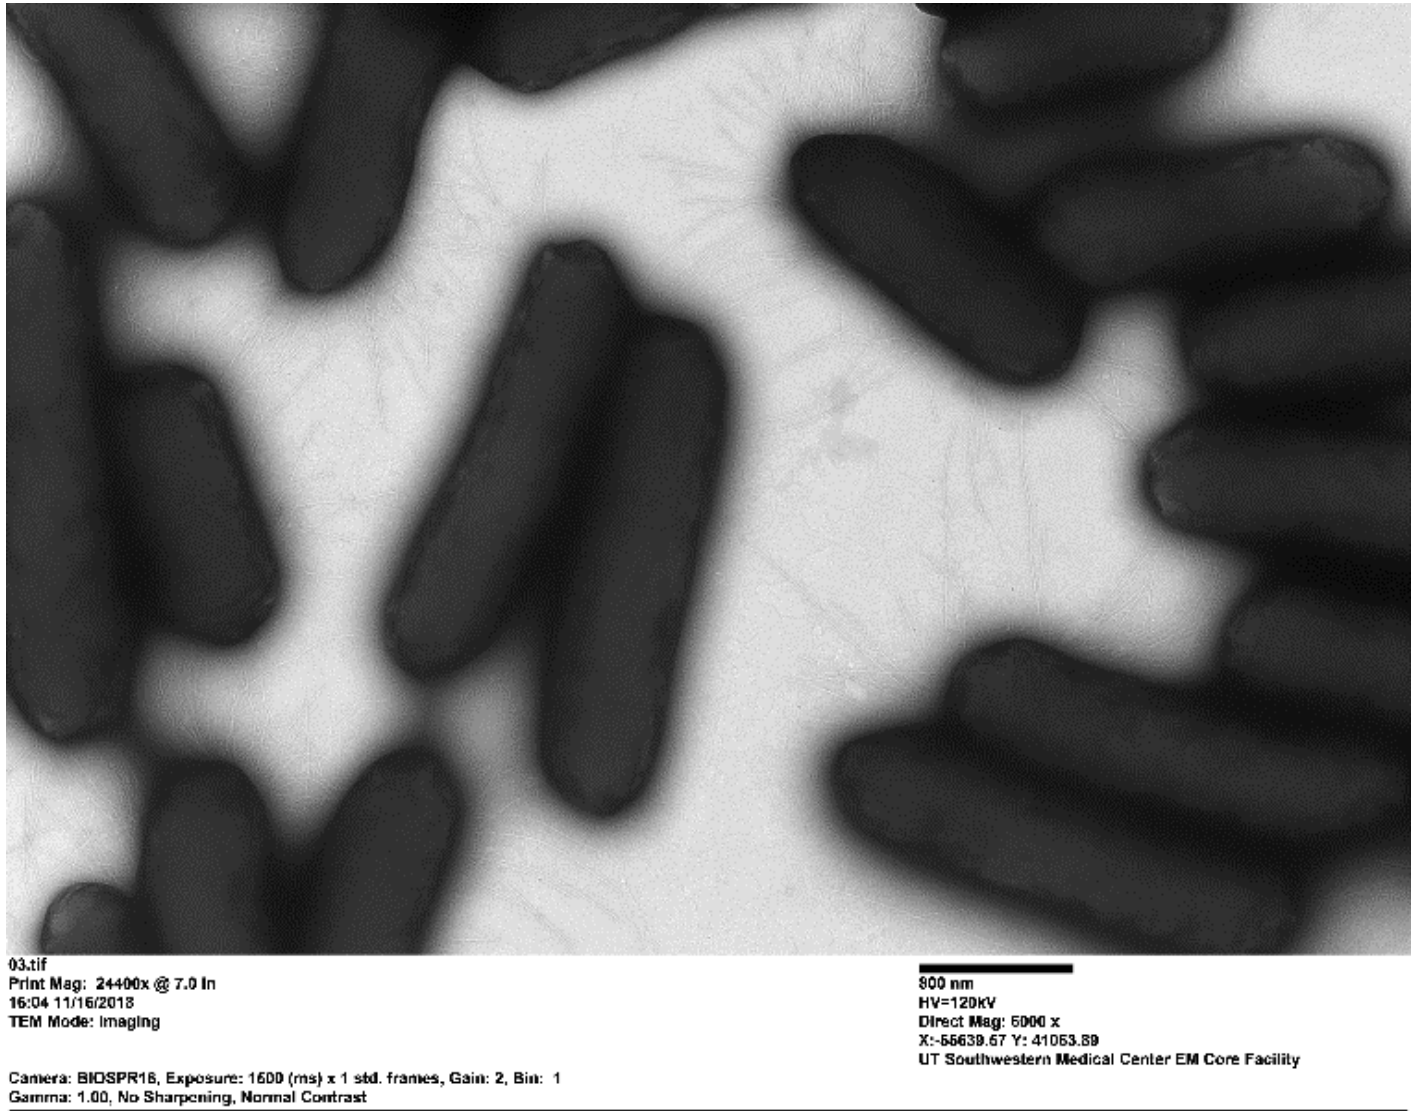

662

663 **Figure 9:** Pili-dependent surface motility of  $\Delta$ *fliC* derivatives of UTI89, MG1655, and W3110.

664  $\Delta$ *fliC* derivatives of UTI89 and MG1655 use pili in the absence of flagella, since  $\Delta$ *fliC*  $\Delta$ *fimA*

665 derivatives do not move. W3110 normally uses pili for surface motility. (A) UTI89, MG1655,

666 and W3110 mutants lacking flagella ( $\Delta$ *fliC*) in medium with the indicated carbohydrate. (B)

667 Surface motility of W3110 and  $\Delta$ *crp* and  $\Delta$ *cyaA* derivatives in surface motility medium with

668 0.5% glucose. (C) Electron microscopy image of the W3110  $\Delta$ *cyaA* mutant showing piliated

669 cells. The pili are in focus, but the bacterial cells are not. The bar indicates 800 nm.



670

671

672

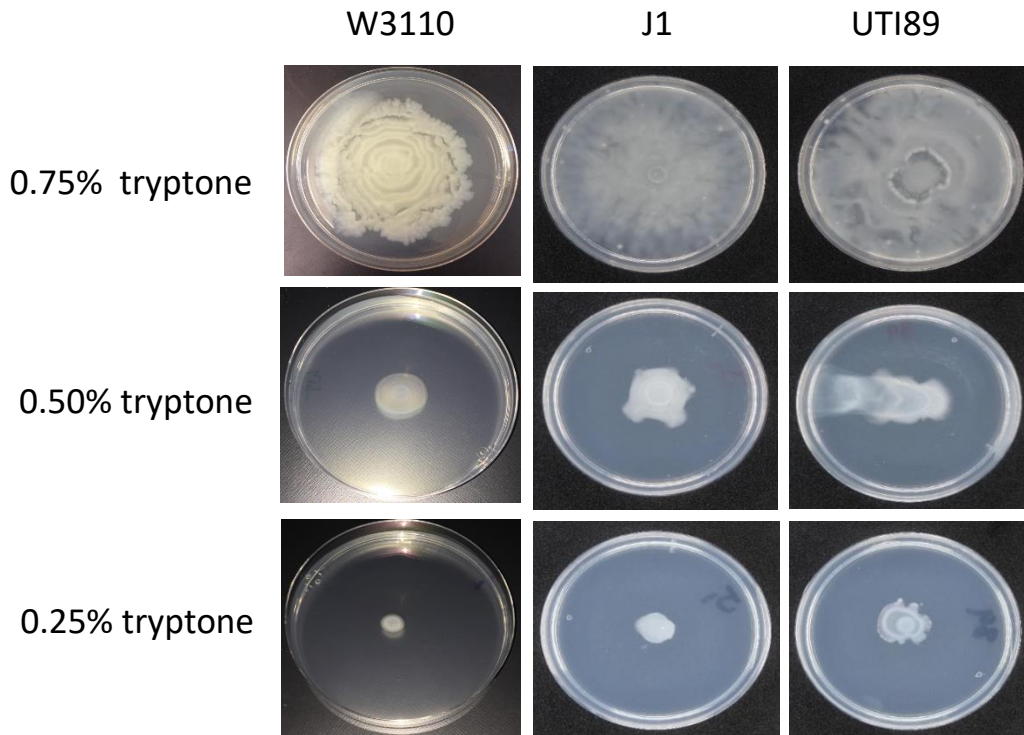

673

674 **Figure 10:** Tryptone requirement for surface motility.

675

676

677

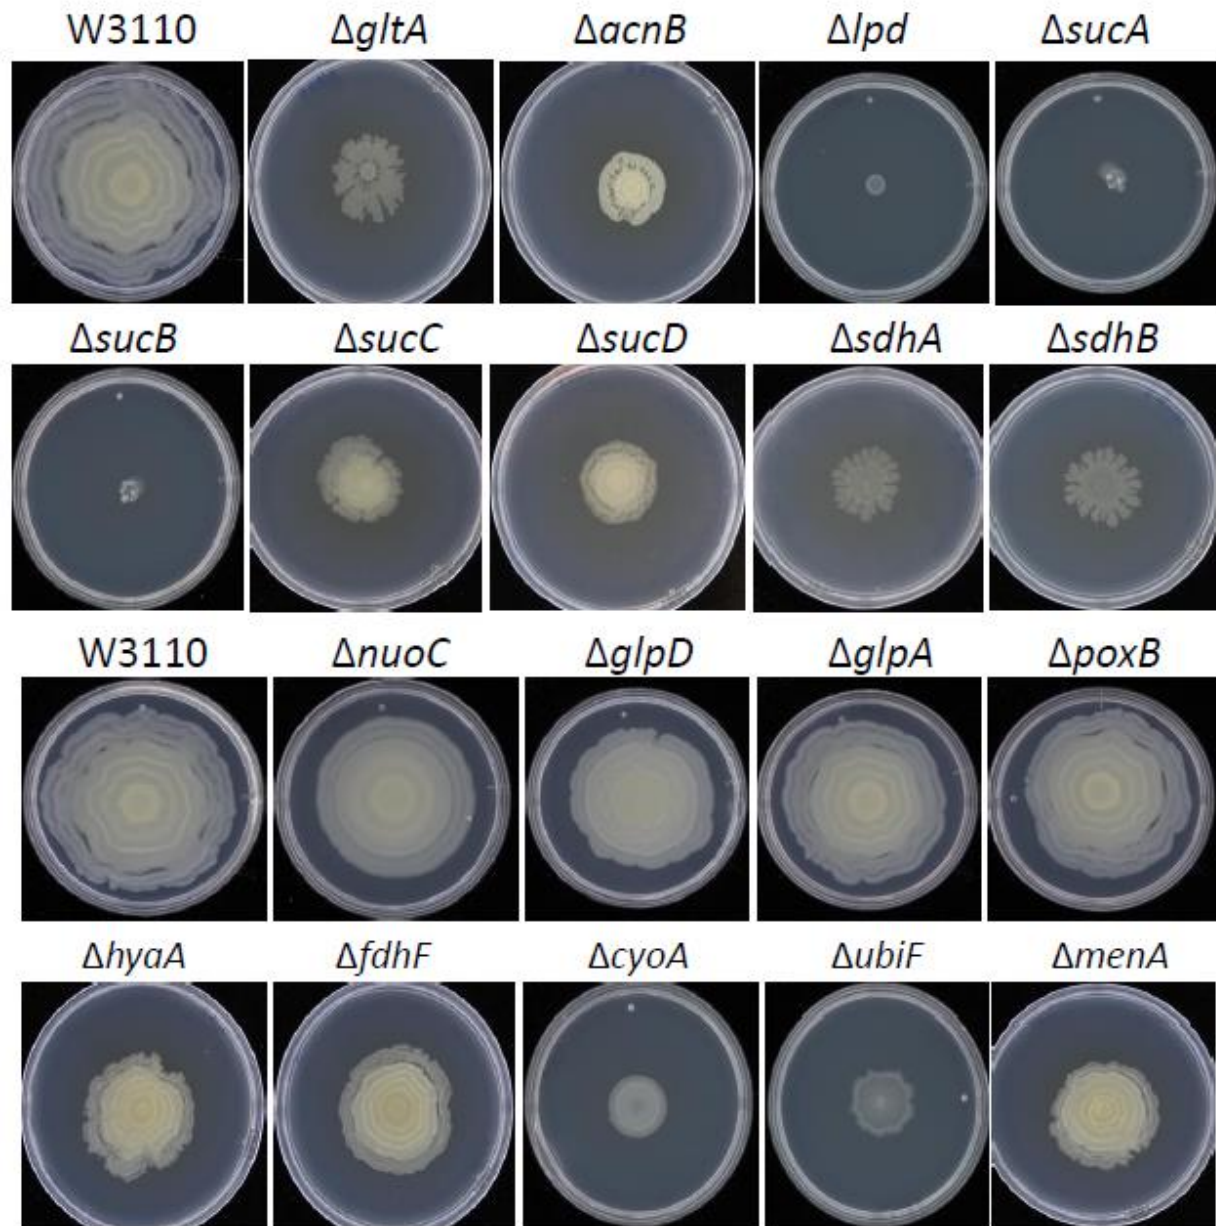

678

**Figure 11:** Surface motility of *W3110* and derivatives lacking TCA cycle and electron transport chain enzymes.

679

680

681

682

683

684

685

686

687

688

689

690

691

692

693

694

695

696

697

698 **Figure 12:** Surface motility of J1 and UTI89 mutants lacking representative TCA cycle enzymes.

699

700

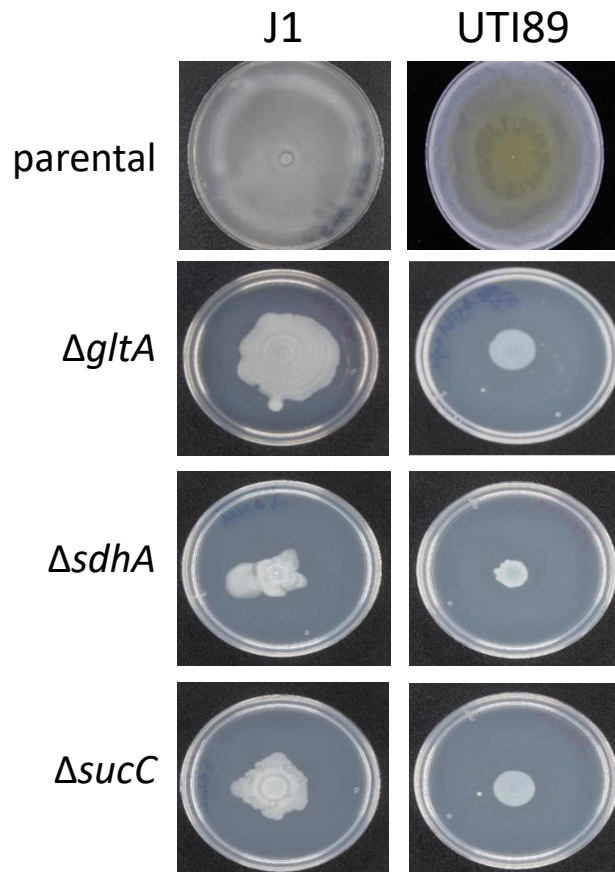

701  
702  
703  
704  
705  
706  
707  
708

*ΔsdhA*

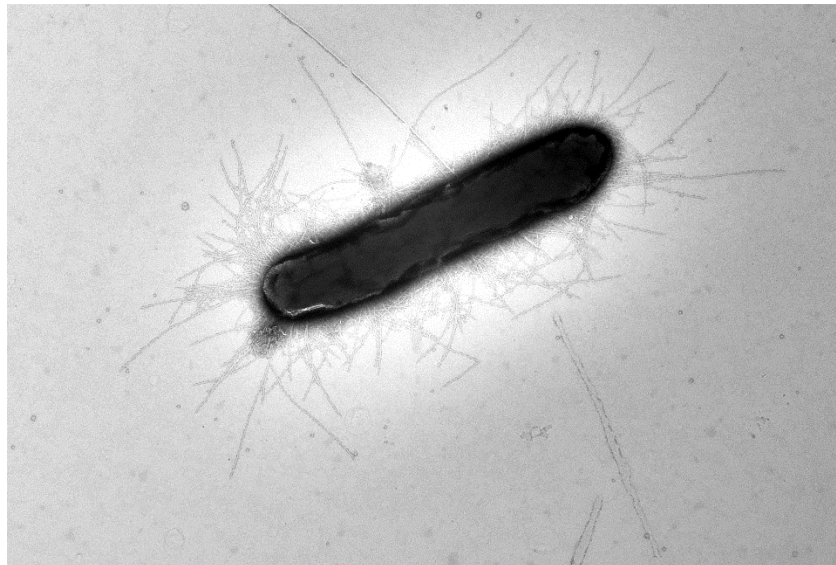

J1 sdhA (1).tif  
Cal: 0.002257 μm/pix  
12.06.4/18/2019  
TEM Mode: Imaging

1 μm  
HV=120kV  
Direct Mag: 4000 x  
X:354523.2 Y: 233366.7  
UT Southwestern Medical Center EM Core Facility

Camera: BIOSPR16, Exposure: 1500 (ms) x 1 std. frames, Gain: 2, Bin: 1  
Gamma: 1.00, No Sharpening, Normal Contrast

709  
710

711  
712  
713  
714  
715  
716  
717

*ΔsucC*

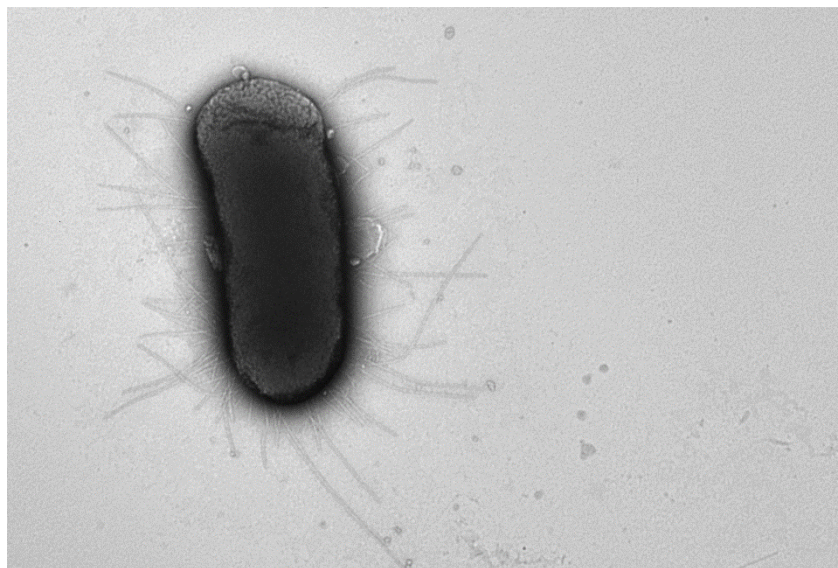

J2 sucC (8).tif  
Cal: 0.001128 μm/pix  
12.42.4/18/2019  
TEM Mode: Imaging

0.6 μm  
HV=120kV  
Direct Mag: 8000 x  
X:-273654.3 Y: 627398.6  
UT Southwestern Medical Center EM Core Facility

Camera: BIOSPR16, Exposure: 1500 (ms) x 1 std. frames, Gain: 2, Bin: 1  
Gamma: 1.00, No Sharpening, Normal Contrast

718  
719

720

721 **Figure 13:** Electron microscopy images of J1 *ΔsdhA* and J1 *ΔsucC*. The bars for *ΔsdhA* and  
722 *ΔsucC* strains are 1 and 0.6 μm, respectively.
